# Supplementary material for: Polymorphisms in nucleotide excision repair genes and risk of primary prostate cancer in Chinese Han populations
Source: PubMed Central journal article supplement (PMC5421853; doi:10.18632/oncotarget.13848), 2016-12-10
Supplement: oncotarget-08-24362-s001.pdf [file oncotarget-08-24362-s001.pdf]

## Polymorphisms in nucleotide excision repair genes and risk of primary prostate cancer in Chinese Han populations

### SUPPLEMENTARY TABLE

Supplementary Table 1: Stratification analysis of significant SNPs by age, smoking status, and BMI

| Variables                  | Age   | Cases      | Controls   | Adjusted         | Interaction           |
|----------------------------|-------|------------|------------|------------------|-----------------------|
|                            | yr    | (n=1004)   | (n=1055)   | OR (95% CI)*     | <i>P</i> <sup>a</sup> |
| rs1870134 × age            |       |            |            |                  | 0.653                 |
| GG                         | ≤ 65  | 198 (19.7) | 190 (18.0) | 1.00             |                       |
| GG                         | >65   | 390 (38.8) | 361 (34.2) | 1.02(0.80-1.30)  |                       |
| CG/CC                      | ≤65   | 137 (13.7) | 178 (16.9) | 0.74 (0.55-0.99) |                       |
| CG/CC                      | >65   | 279 (27.8) | 326 (30.9) | 0.80 (0.62-1.03) |                       |
| rs1870134 × smoking status |       |            |            |                  | 0.713                 |
| GG                         | Never | 232 (23.1) | 215 (20.4) | 1.00             |                       |
| GG                         | Ever  | 356 (35.5) | 336 (31.9) | 1.00 (0.79-1.27) |                       |
| CG/CC                      | Never | 166 (16.5) | 191 (18.1) | 0.80 (0.60-1.05) |                       |
| CG/CC                      | Ever  | 250 (24.9) | 313 (29.7) | 0.75 (0.58-0.96) |                       |
| rs1870134 × BMI            |       |            |            |                  | 0.092                 |
| GG                         | ≤24   | 441 (43.9) | 312 (29.6) | 1.00             |                       |
| GG                         | >24   | 147 (14.6) | 239 (22.7) | 0.44 (0.34-0.57) |                       |
| CG/CC                      | ≤24   | 314 (31.3) | 321 (30.4) | 0.69 (0.56-0.86) |                       |
| CG/CC                      | >24   | 102 (10.2) | 183 (17.4) | 0.40 (0.30-0.53) |                       |

\*Data were calculated by unconditional logistic regression, adjusting for age, smoking status and BMI.

<sup>a</sup>*P* value for Factor 1 × Factor 2 presents a test for the interaction between Factor 1 and Factor 2. The results were in bold, if *P*<0.05.
